# Supplementary material
Source: PubMed Central journal article supplement (PMC4790016)
Supplement: ryad001182.ww2_default.pdf [file ryad001182.ww2_default.pdf]

## Appendix 2: Addition tables [posted as supplied by author]

**Table A: Unit costs and sources**

|                                                                                                                                                                                                                            | Unit                                                     | Cost/unit                  | Source                                                                         |
|----------------------------------------------------------------------------------------------------------------------------------------------------------------------------------------------------------------------------|----------------------------------------------------------|----------------------------|--------------------------------------------------------------------------------|
| <b>Clinical costs associated with the trial</b>                                                                                                                                                                            |                                                          |                            |                                                                                |
| Tele-monitoring costs<br>t+ asthma service<br>Transmission charge                                                                                                                                                          | Cost per patient<br>Reimbursed per patient               | £64.10<br>£5.00            | Contracted cost to provide t+ asthma monitoring for up to 156 people = £10,000 |
| Practice nurse trial consultations<br>Consultation                                                                                                                                                                         | per minute                                               | £0.47                      | Personal Social Services Research Unit.[PSSRU]                                 |
| <b>Other healthcare costs during the 6 months of the trial</b>                                                                                                                                                             |                                                          |                            |                                                                                |
| General practitioner (including Out of Hours)<br>Surgery consultation<br>Telephone consultation<br>GP visit (including travel time)                                                                                        | per consultation<br>per consultation<br>per consultation | £36.00<br>£22.00<br>£58.00 | Personal Social Services Research Unit.[PSSRU]                                 |
| Practice nurse<br>Clinic consultation<br>Telephone consultation                                                                                                                                                            | per consultation<br>per consultation <sup>i</sup>        | £11.00<br>£5.50            | Personal Social Services Research Unit.[PSSRU]                                 |
| Walk-in centre attendance                                                                                                                                                                                                  | per attendance                                           | £33.00                     | Personal Social Services Research Unit.[PSSRU]                                 |
| Respiratory out-patients costs<br>New referral<br>Follow-up appointment                                                                                                                                                    | per consultation<br>per consultation                     | £186.00<br>£118.00         | DH reference costs.[DH]                                                        |
| Accident and Emergency                                                                                                                                                                                                     | per attendance                                           | £111.00                    |                                                                                |
| Inpatient costs<br>Admission <1 days<br>Admission <4 days                                                                                                                                                                  | per admission<br>per admission                           | £269<br>£1097.00           | DH reference costs.[DH]                                                        |
| <b>Asthma prescribing costs in the 6 months of the trial</b>                                                                                                                                                               |                                                          |                            |                                                                                |
| Bronchodilators<br>Inhaled steroids<br>Add-on therapy <sup>ii</sup><br>Combination inhalers <sup>iii</sup><br>Antibiotics (for chest infections)<br>Devices (Peak flow meters, spacers)<br>Prednisolone (for acute asthma) | per inhaler, device or tablet                            |                            | British National Formulary.[BNF]                                               |

Prices are in £ sterling for the year 2008.

<sup>i</sup> Assuming the telephone consultation at half the duration of a surgery consultation

<sup>ii</sup> Long-acting bronchodilators, leukotriene receptor antagonists, theophyllines, anticholinergics, cromones

<sup>iii</sup> Combination inhalers: inhaled steroids + long-acting beta<sub>2</sub> agonists

### Sources:

PSSRU: Curtis L. Unit Costs of Health and Social Care 2008. Personal Social Services Research Unit University of Kent. Available from [www.pssru.ac.uk](http://www.pssru.ac.uk) (accessed December 2011)

DH: Department of Health. National Schedule of Reference Costs 2007-08 for NHS Trusts and PCTs. Available from [http://www.dh.gov.uk/en/Publicationsandstatistics/Publications/PublicationsPolicyAndGuidance/DH\\_098945](http://www.dh.gov.uk/en/Publicationsandstatistics/Publications/PublicationsPolicyAndGuidance/DH_098945) (accessed December 2011)

BNF: British Medical Association and Royal Pharmaceutical Society. *British National Formulary September 2008*. London, BMJ Group and Pharmaceutical Press: 2008



Table B: Per-protocol analysis\*

|                                               |                                         | Baseline<br>Mean (SD) | 6 months<br>Mean (SD) | Mean change<br>(95% CI) | Mean difference of mean change (95% CI) |
|-----------------------------------------------|-----------------------------------------|-----------------------|-----------------------|-------------------------|-----------------------------------------|
| <i>Primary outcomes</i>                       |                                         |                       |                       |                         |                                         |
| <b>ACQ</b>                                    | Mobile phone-based<br>monitoring (n=66) | 2.30 (0.72)           | 1.42 (0.98)           | 0.88 (0.66 to 1.10)     | 0.04 (-0.25, 0.33)                      |
|                                               | Paper-based monitoring (n=79)           | 2.16 (0.61)           | 1.24 (0.80)           | 0.92 (0.73 to 1.11)     |                                         |
| <b>KASE-AQ<br/>(Self-efficacy<br/>scale)</b>  | Mobile phone-based<br>monitoring (n=48) | 77.4 (9.0)            | 82.0 (11.8)           | -4.6 (-7.6 to -1.6)     | 0.2 (-3.6, 3.9)                         |
|                                               | Paper-based monitoring (n=58)           | 80.1 (9.8)            | 84.5 (9.6)            | -4.4 (-6.8 to -2.0)     |                                         |
| <b>KASE-AQ<br/>(Attitude<br/>scale)</b>       | Mobile phone-based<br>monitoring (n=52) | 79.6 (7.0)            | 82.1 (10.6)           | -2.5 (-4.6 to -0.4)     | -0.2 (-3.1, 2.7)                        |
|                                               | Paper-based monitoring (n=53)           | 80.6 (6.4)            | 83.3 (8.1)            | -2.8 (-4.8 to -0.7)     |                                         |
| <i>Questionnaire-based secondary outcomes</i> |                                         |                       |                       |                         |                                         |
| <b>miniAQLQ</b>                               | Mobile phone-based<br>monitoring (n=35) | 4.30 (0.94)           | 5.27 (1.32)           | -0.97 (-1.16 to -0.69)  | 0.11 (-0.31, 0.54)                      |
|                                               | Paper-based monitoring (n=45)           | 4.57 (0.94)           | 5.43 (1.17)           | -0.86 (-1.18 to -0.53)  |                                         |
| <b>mPEI</b>                                   | Mobile phone-based<br>monitoring (n=67) | 6.03 (3.45)           | 7.13 (4.22)           | -1.10 (-2.15 to -0.06)  | 1.42 (-0.02, 2.86)                      |
|                                               | Paper-based monitoring (n=72)           | 7.33 (3.71)           | 7.01 (4.01)           | 0.32 (-0.69 to 1.33)    |                                         |

\* This table includes only subjects that had complete information for each respective questionnaire at all time points

Table C: Trends over time: Intention-to-treat analysis of repeat values

|                                               | Baseline Mean (SD) | 3 months Mean (SD) | 6 months Mean (SD) | Mean change (95% CI)   |                        | Repeat measures p-values* |               |
|-----------------------------------------------|--------------------|--------------------|--------------------|------------------------|------------------------|---------------------------|---------------|
|                                               |                    |                    |                    | Baseline to 3 months   | Baseline to 6 months   | Within group              | Between group |
| <i>Primary outcomes</i>                       |                    |                    |                    |                        |                        |                           |               |
| <b>ACQ</b>                                    |                    |                    |                    |                        |                        |                           |               |
| Mobile phone-based monitoring (n=139)         | 2.32 (0.73)        | 1.95 (0.89)        | 1.57 (0.99)        | 0.37 (0.25 to 0.49)    | 0.75 (0.61 to 0.89)    | < 0.001                   | 0.680         |
| Paper-based monitoring (n=139)                | 2.29 (0.77)        | 1.78 (1.05)        | 1.56 (1.09)        | 0.50 (0.36 to 0.64)    | 0.73 (0.57 to 0.89)    |                           |               |
| <b>KASE-AQ (Self-efficacy scale)</b>          |                    |                    |                    |                        |                        |                           |               |
| Mobile phone-based monitoring (n=110)         | 77.4 (9.5)         | 78.7 (9.9)         | 81.8 (11.1)        | -1.3 (-2.6 to 0)       | -4.4 (-6.1 to -2.7)    | 0.067                     | 0.492         |
| Paper-based monitoring (n=121)                | 78.0 (10.5)        | 78.5 (11.1)        | 80.4 (11.5)        | -0.5 (-1.6 to 0.6)     | -2.4 (-3.9 to -0.9)    |                           |               |
| <b>KASE-AQ (Attitude scale)</b>               |                    |                    |                    |                        |                        |                           |               |
| Mobile phone-based monitoring (n=118)         | 80.0 (7.4)         | 80.6 (8.3)         | 81.8 (9.5)         | -0.5 (-1.3 to 0.2)     | -1.7 (-2.9 to -0.6)    | 0.389                     | 0.340         |
| Paper-based monitoring (n=122)                | 79.4 (7.2)         | 80.0 (7.8)         | 81.2 (8.6)         | -0.6 (-1.5 to 0.3)     | -1.8 (-2.9 to -0.6)    |                           |               |
| <i>Questionnaire-based secondary outcomes</i> |                    |                    |                    |                        |                        |                           |               |
| <b>miniAQLQ</b>                               |                    |                    |                    |                        |                        |                           |               |
| Mobile phone-based monitoring (n=97)          | 4.25 (0.91)        | 4.67 (1.38)        | 5.0 (1.32)         | -0.43 (-0.60 to -0.26) | -0.75 (-0.94 to -0.57) | 0.001                     | 0.495         |
| Paper-based monitoring (n=104)                | 4.34 (1.08)        | 4.81 (1.32)        | 4.99 (1.34)        | -0.47 (-0.65 to -0.29) | -0.65 (-0.84 to -0.46) |                           |               |
| <b>mPEI</b>                                   |                    |                    |                    |                        |                        |                           |               |
| Mobile phone-based monitoring (n=136)         | 5.83 (3.67)        | 6.20 (3.77)        | 6.79 (4.0)         | -0.37 (-0.89 to 0.15)  | -0.96 (-1.62 to -0.31) | 0.135                     | 0.485         |
| Paper-based monitoring (n=135)                | 6.93 (3.78)        | 6.30 (3.83)        | 6.71 (3.92)        | 0.64 (0.07 to 1.20)    | 0.22 (-0.44 to 0.88)   |                           |               |

\* adjusted for age and gender † Two-way interactions between all outcomes and groups examined were not significant except for mPEI which was significant (p = 0.024)
